# Supplementary material for: Inferring Clonal Composition from Multiple Sections of a Breast Cancer
Source: PubMed Central journal article supplement (PMC4091710; doi:10.1371/journal.pcbi.1003703), 2014-07-10
Supplement: pcbi.1003703.s004.pdf [file pcbi.1003703.s004.pdf]

# Supplement to “Inferring clonal composition from multiple sections of a breast cancer”

Habil Zare<sup>1,\*</sup>, Junfeng Wang<sup>2,\*</sup>, Alex Hu<sup>1</sup>, Kris Weber<sup>1</sup>, Josh Smith<sup>1</sup>, Debbie Nickerson<sup>1</sup>, ChaoZhong Song<sup>2</sup>, Daniela Witten<sup>3,†</sup>, C. Anthony Blau<sup>2,†</sup>, and William Stafford Noble<sup>1,4,†</sup>

<sup>1</sup>Department of Genome Sciences, University of Washington, Seattle, WA

<sup>2</sup>Division of Hematology, Department of Medicine, University of Washington, Seattle, WA

<sup>3</sup>Department of Biostatistics, University of Washington, Seattle, WA

<sup>4</sup>Department of Computer Science and Engineering, University of Washington, Seattle, WA

## Note S1

**Lemma 1.1** *Suppose  $f : \mathbb{R}^n \rightarrow \mathbb{R}$  is a real valued function with  $n$  parameters  $x_1, \dots, x_n$ . Consider the optimization problems*

$$\begin{cases} \hat{x} = \operatorname{argmax}_x f(x_1, \dots, x_n) \\ \text{subject to } 0 \leq x_i, \sum_i x_i < 1 \end{cases} \quad (\text{S1})$$

and

$$\begin{cases} \hat{v} = \operatorname{argmax}_v f\left(\frac{v_1}{1 + \sum_i v_i}, \dots, \frac{v_n}{1 + \sum_i v_i}\right) \\ \text{subject to } 0 \leq v_i \end{cases} . \quad (\text{S2})$$

There is a one-to-one mapping between their solutions:

$$\hat{x}_i = \frac{\hat{v}_i}{1 + \sum_i \hat{v}_i}, 1 \leq i \leq n. \quad (\text{S3})$$

**Proof** First, notice that the mapping (S3) is one-to-one, since

$$\hat{v}_i = \frac{\hat{x}_i}{1 - \sum_i \hat{x}_i}, 1 \leq i \leq n.$$

Second, notice that  $\frac{\hat{v}_i}{1 + \sum_i \hat{v}_i}$  is in the feasible set of (S1), since  $\frac{\hat{v}_i}{1 + \sum_i \hat{v}_i} > 0$  and  $\sum_{i=1}^n \frac{\hat{v}_i}{1 + \sum_i \hat{v}_i} < 1$  for  $\hat{v}_i \geq 0$ . The result follows directly. ■

## Note S2

Note that from Equation 2 we have:

$$\frac{\partial \pi_{i,j}}{\partial P_{c,j}} = \frac{\partial (\frac{1}{2} \mathbf{Z}_i \cdot P^j)}{\partial P_{c,j}} = \frac{1}{2} \mathbf{Z}_{i,c}.$$

In what follows,  $\Phi : \mathbb{R}^{C \times M} \rightarrow \mathbb{R}$  is a multivariable function of  $P$  defined in Equation 9. Also, for any fixed  $1 \leq j \leq m$ ,  $P_{c,j} : \mathbb{R}^{C-1} \rightarrow \mathbb{R}$  is a function of  $(V_{2,j}, \dots, V_{C,j})$  as defined in Equation S15. Because  $P_{c,j'}$  does not depend on  $V_{c,j}$  if  $j' \neq j$ , the partial derivative  $\frac{\partial \Phi}{\partial V_{c,j}}$  depends only on  $P_{c',j}$  for  $1 < c' \leq C$ . We have:

$$\begin{aligned}
\frac{\partial \Phi}{\partial V_{c,j}} &= \sum_{c'=2}^C \left( \frac{\partial \Phi}{\partial P_{c',j}} \cdot \frac{\partial P_{c',j}}{\partial V_{c,j}} \right) \\
&= \sum_{c'=2}^C \left( \left( \sum_{i=1}^N \frac{\partial \Phi}{\partial \pi_{i,j}} \cdot \frac{\partial \pi_{i,j}}{\partial P_{c',j}} \right) \cdot \frac{\partial P_{c',j}}{\partial V_{c,j}} \right) \\
&= \frac{1}{2} \sum_{c'} \left( \left( \sum_{i,z} \left( q_{\mathbf{z},i} \left( \frac{\mathbf{X}_{i,j}}{\pi_{i,j}} - \frac{R_{i,j} - \mathbf{X}_{i,j}}{1 - \pi_{i,j}} \right) \mathbf{z}_{i,c'} \right) \right) \cdot \frac{\partial}{\partial V_{c,j}} \left( \frac{V_{c',j}}{1 + \sum_{1 < c''} V_{c'',j}} \right) \right) \\
&= \sum_{c'} \left( \left( \sum_{i,z} \left( q_{\mathbf{z},i} \mathbf{z}_{i,c'} \left( \frac{\mathbf{X}_{i,j}}{\pi_{i,j}} - \frac{R_{i,j} - \mathbf{X}_{i,j}}{1 - \pi_{i,j}} \right) \right) \right) \cdot \frac{(1 + \sum_{1 < c''} V_{c'',j}) \mathbb{1}_c(c') - V_{c',j}}{2(1 + \sum_{1 < c''} V_{c'',j})^2} \right)
\end{aligned}$$

where  $\pi_{i,j} = \frac{1}{2} \mathbf{z}_i \cdot P^j$ , and the identity function  $\mathbb{1}_c(c') = 1$  if  $c' = c$ , and it is zero otherwise.

### Note S3

To estimate the probability of obtaining a random genotype matrix that corresponds to a valid phylogenetic tree, we randomly generated one million such matrices, independently setting each bit to 1 or 0 by a fair coin flip. We then asked whether, for each matrix, it is possible to generate a corresponding phylogenetic tree. This is the case if, for each pair of rows in the genotype matrix, the bitwise “AND” of the rows either (1) consists of all zeroes, or (2) is equal to one of the rows. Out of one million  $17 \times 3$  matrices, 2.2% were phylogenetically consistent. The corresponding percentages for  $17 \times 4$  and  $17 \times 5$  matrices were 0.0097% and 0.0001%.

### Note S4

The complete-data log likelihood, which was defined in Equation 4 in the main text, can be computed as follows. Because loci are independent of each other, we can write  $\mathcal{L}$  as the sum of the log likelihood associated with each locus. Then

$$\begin{aligned}
\mathcal{L} &= \log \Pr(\mathbf{X}, \mathbf{Z} | \theta) \\
&= \sum_{1 \leq i \leq N} \log \Pr(\mathbf{X}_i, \mathbf{Z}_i | \theta) \\
&= \sum_{1 \leq i \leq N} \log \left( \Pr(\mathbf{X}_i | \mathbf{Z}_i, \theta) \Pr(\mathbf{Z}_i | \theta) \right) \tag{S4}
\end{aligned}$$

$$= \sum_{1 \leq i \leq N} \log \left( \Pr(\mathbf{X}_i | \mathbf{Z}_i, \mu_i, P) \Pr(\mathbf{Z}_i | \mu_i, P) \right) \tag{S5}$$

$$= \sum_{1 \leq i \leq N} \left( \log \left( \Pr(\mathbf{X}_i | \mathbf{Z}_i, \mu_i, P) \right) + \log \left( \Pr(\mathbf{Z}_i | \mu_i, P) \right) \right). \tag{S6}$$

Equations S4 and S5 are obtained by conditional probability and the definition of  $\theta$ , respectively. Note that conditioned on  $\mu_i$ , the random variable  $\mathbf{Z}_i$  is independent from  $P$ ; therefore,  $\Pr(\mathbf{Z}_i|\mu_i, P) = \Pr(\mathbf{Z}_i|\mu_i)$ . Similarly,  $\Pr(\mathbf{X}_i|\mathbf{Z}_i, \mu_i, P) = \Pr(\mathbf{X}_i|\mathbf{Z}_i, P)$ . Then

$$\mathcal{L} = \underbrace{\sum_i \log \Pr(\mathbf{X}_i|\mathbf{Z}_i, P)}_{\mathcal{L}_X} + \underbrace{\sum_i \log \Pr(\mathbf{Z}_i|\mu_i)}_{\mathcal{L}_Z}. \quad (\text{S7})$$

We compute each of the two terms in Equation S7 separately, starting with the second term,  $\mathcal{L}_Z$ , which is simpler to compute. Recalling that each entry  $\mathbf{Z}_{i,c}$  is an independent Bernoulli random variable with parameter  $\mu_{i,c}$ , we have

$$\begin{aligned} \mathcal{L}_Z &= \sum_{1 \leq i \leq N} \log \Pr(\mathbf{Z}_i|\mu_i) \\ &= \sum_{1 \leq i \leq N} \log \left( \prod_{1 \leq c \leq C} \Pr(\mathbf{Z}_{i,c}|\mu_{i,c}) \right) \\ &= \sum_{i,c} \log \left( (\mu_{i,c})^{\mathbf{Z}_{i,c}} (1 - \mu_{i,c})^{1 - \mathbf{Z}_{i,c}} \right) \end{aligned} \quad (\text{S8})$$

$$= \sum_{i,c} (\mathbf{Z}_{i,c} \log(\mu_{i,c}) + (1 - \mathbf{Z}_{i,c}) \log(1 - \mu_{i,c})). \quad (\text{S9})$$

To compute  $\mathcal{L}_X$ , we use the assumption of independence between subsections to get

$$\begin{aligned} \mathcal{L}_X &= \sum_i \log \Pr(\mathbf{X}_i|\mathbf{Z}_i, P) \\ &= \sum_{1 \leq i \leq N} \log \left( \prod_{1 \leq j \leq M} \Pr(\mathbf{X}_{i,j}|\mathbf{Z}_i, P^j) \right) \\ &= \sum_{i,j} \log \Pr(\mathbf{X}_{i,j}|\mathbf{Z}_i, P^j). \end{aligned}$$

Note that conditioned on  $\mathbf{Z}$  and  $P$ , for any locus  $i$  and subsection  $j$ ,  $\mathbf{X}_{i,j}$  is a binomial random variable with parameters  $R_{i,j}$  and  $\pi_{i,j} = \frac{1}{2} \mathbf{Z}_i \cdot P^j$  (Equations 2 and 3). Also, the total number of reads,  $R_{i,j}$ , is known from the experiment. Therefore, we have

$$\begin{aligned} \mathcal{L}_X &= \sum_{i,j} \log \Pr(\mathbf{X}_{i,j}|\mathbf{Z}_i, P^j) \\ &= \sum_{i,j} \left( \log \binom{R_{i,j}}{\mathbf{X}_{i,j}} + \mathbf{X}_{i,j} \log(\pi_{i,j}) + (R_{i,j} - \mathbf{X}_{i,j}) \log(1 - \pi_{i,j}) \right). \end{aligned} \quad (\text{S10})$$

Finally, substituting Equations S9 and S10 into Equation S7 yields the following formula for the complete-data log likelihood:

$$\begin{aligned} \mathcal{L} &= \mathcal{L}_X + \mathcal{L}_Z \\ &= \sum_{i,j} \left( \log \binom{R_{i,j}}{\mathbf{X}_{i,j}} + \mathbf{X}_{i,j} \log(\pi_{i,j}) + (R_{i,j} - \mathbf{X}_{i,j}) \log(1 - \pi_{i,j}) \right) \\ &\quad + \sum_{i,c} (\mathbf{Z}_{i,c} \log(\mu_{i,c}) + (1 - \mathbf{Z}_{i,c}) \log(1 - \mu_{i,c})), \end{aligned}$$

where  $\pi_{i,j} = \frac{1}{2} \mathbf{Z}_i \cdot P^j$ .

## Note S5

$P^{\text{new}}$  is the solution of the following constrained optimization problem:

$$\begin{cases} P^{\text{new}} := \operatorname{argmax}_P \Phi(P) \\ \text{such that } \forall j, c : 0 \leq P_{c,j} \text{ and } \forall j : \sum_{c=1}^C P_{c,j} = 1. \end{cases} \quad (\text{S11})$$

To simplify  $\Phi(P)$ , we let  $q_{\mathbf{Z}_i}$  be the the posterior probability for locus  $i$ , defined as

$$q_{\mathbf{Z}_i} := \Pr(\mathbf{Z}_i | \mathbf{X}_i, \theta^{\text{old}}). \quad (\text{S12})$$

By substituting binomial distributions from Equation 8, we get:

$$\begin{aligned} \Phi(P) &= \mathbb{E}_{\mathbf{Z} | \mathbf{X}, \theta^{\text{old}}} [\log \Pr(\mathbf{X} | \mathbf{Z}, P)] \\ &= \mathbb{E}_{\mathbf{Z} | \mathbf{X}, \theta^{\text{old}}} \left[ \sum_i \log \Pr(\mathbf{X}_i | \mathbf{Z}_i, P) \right] \\ &= \sum_{i=1}^N \mathbb{E}_{\mathbf{Z}_i | \mathbf{X}_i, \theta^{\text{old}}} [\log \Pr(\mathbf{X}_i | \mathbf{Z}_i, P)] \\ &= \sum_{i=1}^N \sum_{z \in \{0,1\}^C} (q_{\mathbf{Z}_i} \log \Pr(\mathbf{X}_i | \mathbf{Z}_i = z, P)) \\ &= \sum_{\substack{i=1, j=1 \\ z \in \{0,1\}^C}}^{i=N, j=M} \left( q_{\mathbf{Z}_i} \left( \log \binom{R_{i,j}}{\mathbf{X}_{i,j}} + \mathbf{X}_{i,j} \log(\pi_{i,j}) + (R_{i,j} - \mathbf{X}_{i,j}) \log(1 - \pi_{i,j}) \right) \right) \end{aligned} \quad (\text{S13})$$

where  $\pi_{i,j} = \frac{1}{2} \mathbf{Z}_i \cdot P^j$ .

We point out several facts that help in maximizing  $\Phi(P)$ :

- All terms other than  $\pi$  in Equation S13 are fixed. In particular,  $q_{\mathbf{Z}_i}$  is known because it is a function of  $\theta^{\text{old}}$ .
- Because Equation S13 is a summation over the values of  $j$  from 1 to  $M$ , and the samples are assumed to be independent, maximization can be done by solving  $M$  independent problems.
- Because the first column of  $\mathbf{Z}$  corresponds to normal contamination,  $\mathbf{Z}_{i,1} = 0$  for the  $i^{\text{th}}$  locus. This means that  $\pi_{i,j}$  and therefore  $\Phi$  are constant with respect to  $P^1$ , the first column of  $P$ . However, since we have assumed that each column of  $P$  sums to 1, there is a simple relationship between  $P_{1,j}$  and  $P_{2,j}, \dots, P_{C,j}$ :

$$P_{1,j} = 1 - \sum_{1 < c} P_{c,j}.$$

- Recall that we assumed  $P_{1,j} > 0$  due to contamination with normal cells in each subsection. So for  $1 \leq j \leq M$ , the optimization problem (S11) can be written in this form:

$$\begin{cases} P^{j \text{ new}} := \operatorname{argmax}_{P^j} \sum_{i=1}^N \sum_{z \in \{0,1\}^C} \left( q_{\mathbf{Z}_i} \left( \log \binom{R_{i,j}}{\mathbf{X}_{i,j}} + \mathbf{X}_{i,j} \log\left(\frac{1}{2} \mathbf{Z}_i \cdot P^j\right) + (R_{i,j} - \mathbf{X}_{i,j}) \log\left(1 - \frac{1}{2} \mathbf{Z}_i \cdot P^j\right) \right) \right) \\ \text{such that } \forall j, 1 < c : 0 \leq P_{c,j} \text{ and } \forall j : \sum_{1 < c} P_{c,j} < 1. \end{cases} \quad (\text{S14})$$

We use Lemma 1.1 in Note S1 to solve Equation S14 by a change of variables,

$$P_{c,j} := \frac{V_{c,j}}{1 + \sum_{1 < c' \leq C} V_{c',j}}, 1 \leq j \leq M, 1 < c \leq C, \quad (\text{S15})$$

which eliminates the need for the constraint  $\sum_{1 < c} P_{c,j} < 1$  provided that  $V_{c,j} \geq 0$ . For simplicity of notation, we set  $V_{1,j} = 0$  so that  $V_{C \times M}$  has the same dimension as  $P_{C \times M}$ . The choice of 0 is arbitrary because  $V_{1,j}$  has no role in Equation S15.

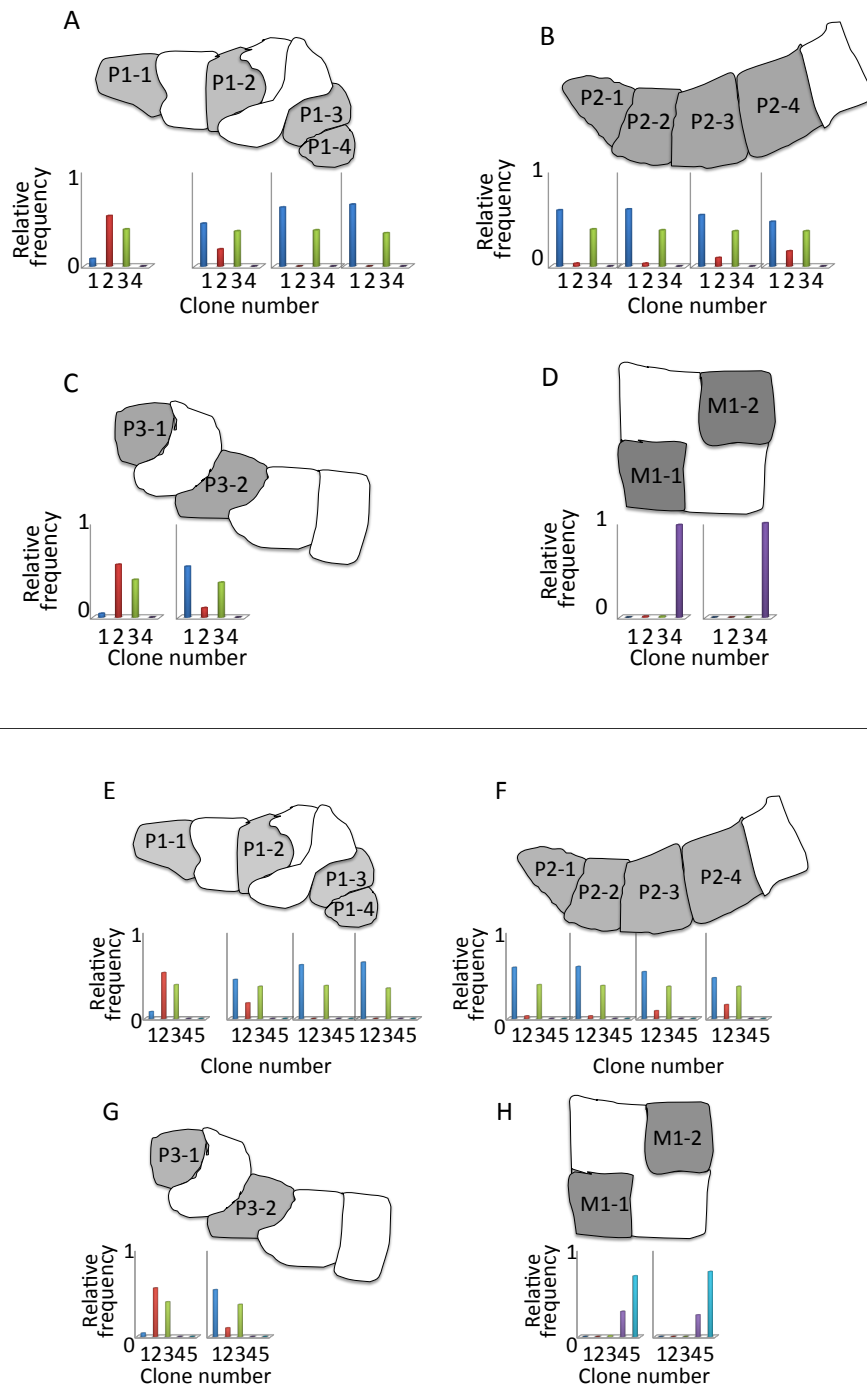

**Figure S 1: Clone frequencies vary smoothly across adjacent subsections.** Each panel displays, for a different section, the pattern of inferred clone frequencies across subsections. Each bar plot shows the relative frequencies of tumor clones in the corresponding subsection after accounting for normal contamination. Clones are numbered as in Figure 4, and the normal clone, C0, is not shown. Panels A–D show the C=5 solution, and panels E–H show the C=6 solution.

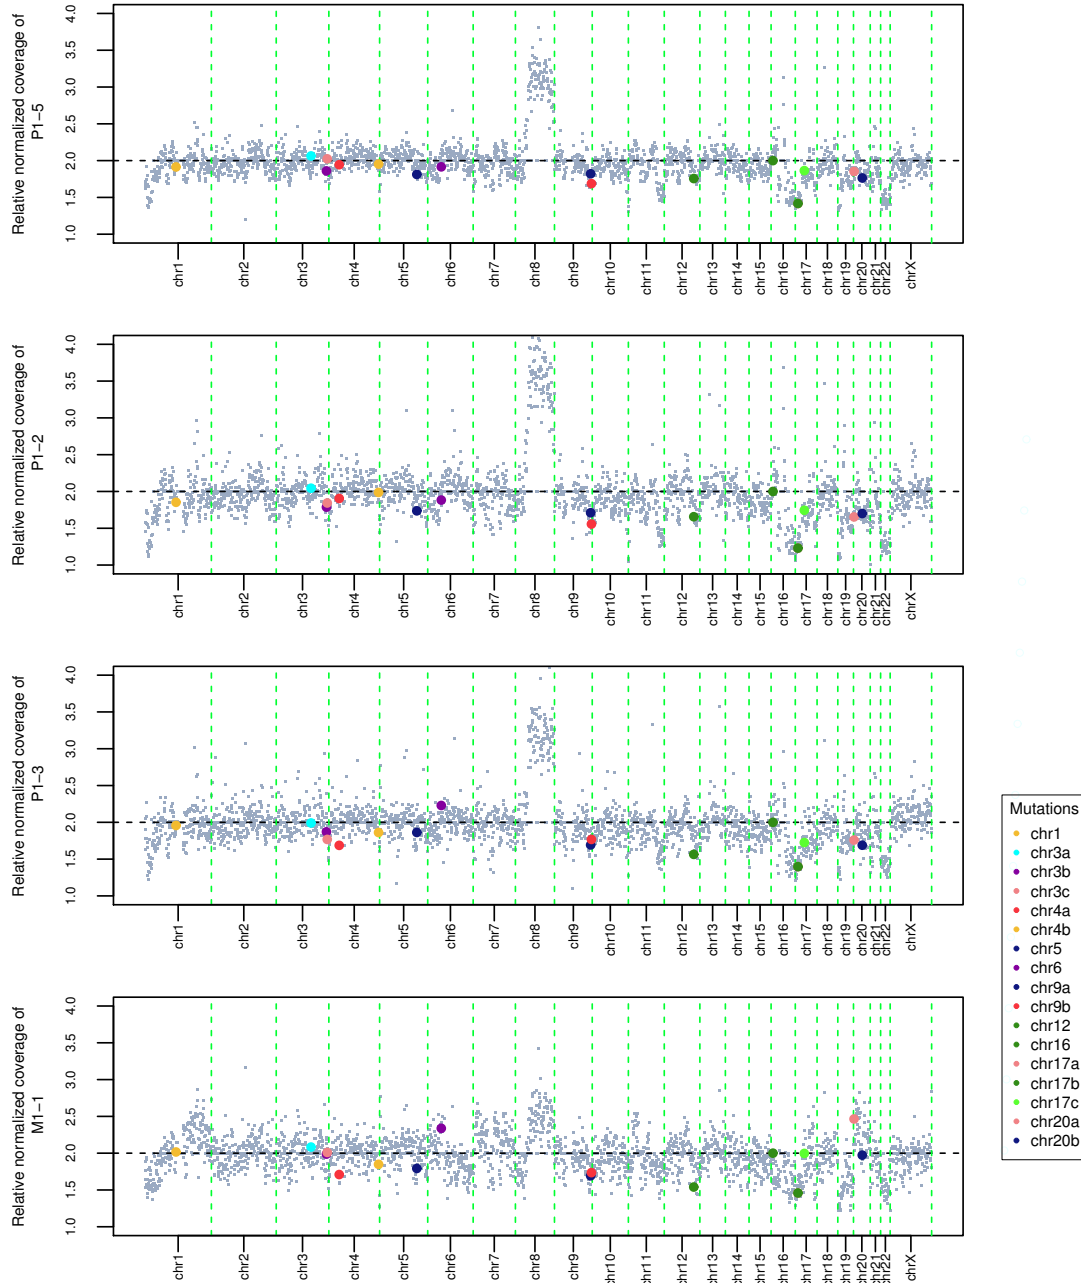

**Figure S 2: Copy number variation across samples.** Each panel shows, for a specified primary tumor subsection, the relative normalized coverage observed per 1 Mbp window (i.e., the ratio of counts in the window over the total counts from a tumor subsection, divided by the corresponding ratio for the normal sample). The 17 loci analyzed in this study are indicated with colored dots. Note that the dot for locus chr17a is occluded by the dot for the adjacent locus chr17b. The color scheme here is the same as in Figure 6. The 17 loci analyzed in this study are indicated with colored dots using the color scheme from Figure 6. Note that the dot for locus chr17a is occluded by the dot for the adjacent locus chr17b.

(A)

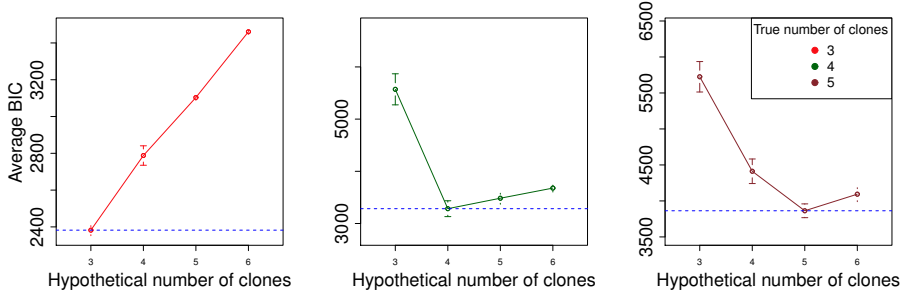

(B)

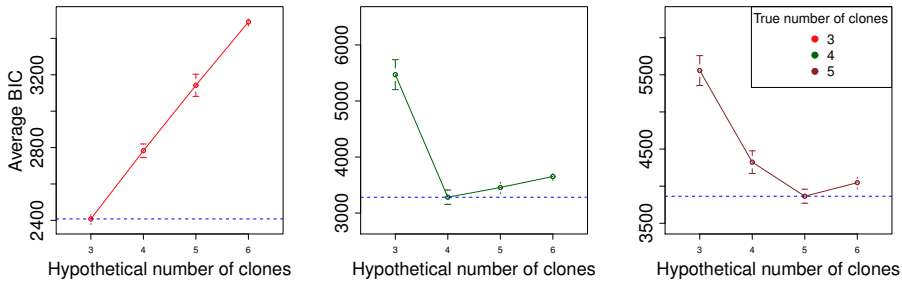

(C)

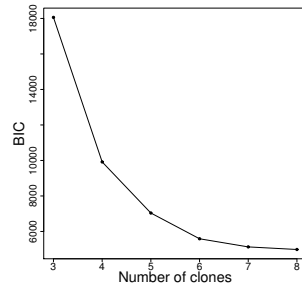

**Figure S 3: BIC analysis.** (A) Each panel plots the average BIC over 100 simulated data sets (y-axis) as a function of the hyperparameter  $C$ , the assumed number of clones (x-axis). Similar to Figure 2, the true number of clones for each panel is shown by colors in the legend. In each case, the minimum average BIC is achieved at the true clone number. (B) Adding sequencing noise with rate 1% to the simulated data does not affect the performance of BIC. (C) BIC values are shown for models trained on our real breast cancer data. While the BIC exhibits a large decrease (45%) when  $C$  increases from 3 to 4, the subsequent improvements of the BIC are smaller: 29%, 20%, 9%, and 3%, respectively, as  $C$  grows from 4 to 8.



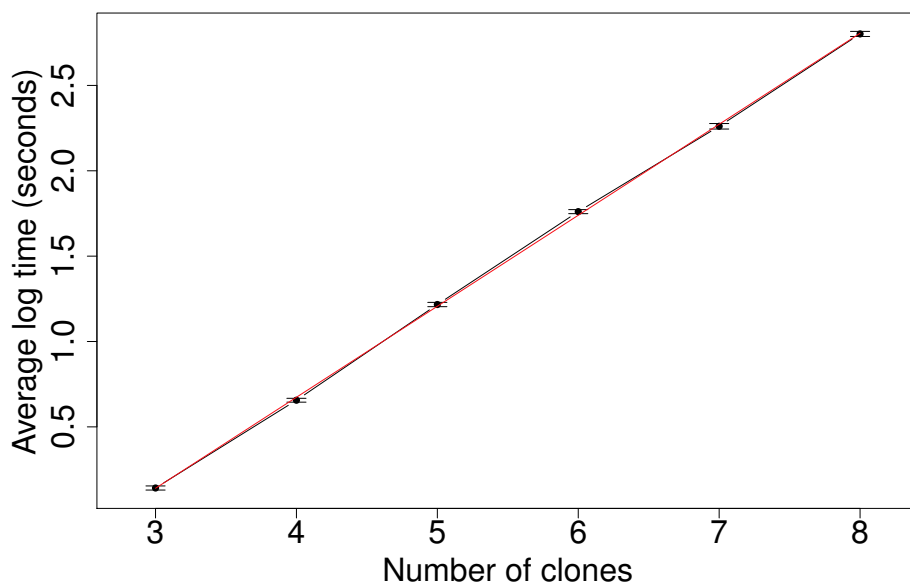

**Figure S 4: Computational time.** The average time for EM training to converge on the breast cancer data (y-axis) is plotted as a function of the hyperparameter  $C$ , the assumed number of clones (x-axis). The y-axis is on a  $\log_{10}$  scale, and the red line is a linear fit which shows that the training time grows exponentially with  $C$ . Each training task was obtained using a 2.40GHz processor with 2 GB memory. Values are averaged over 100 EM runs, trained from different random initializations.

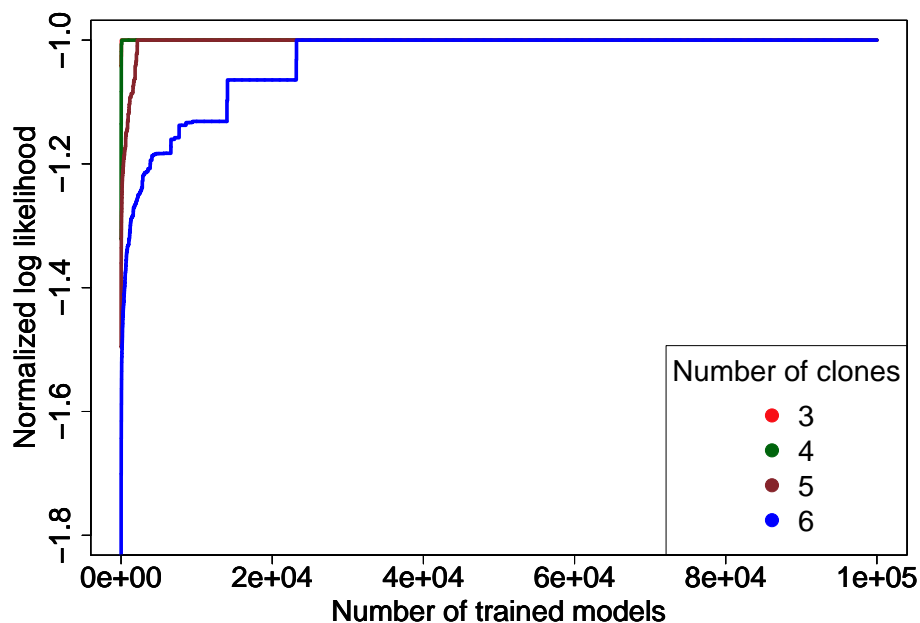

**Figure S 5: Improving likelihood by multiple initializations.** The figure plots, for different values of  $C$ , the best log likelihood obtained as a function of the number of EM runs. Specifically, for any  $k$  number of EM instances (x-axis), the normalized log-likelihood (y-axis) was obtained by dividing the best log-likelihood of  $k$  models by absolute value of the maximum observed log-likelihood. The reported value is the median over 1000 random orderings of a fixed set of 100,000 likelihoods. The curve corresponding to 3 clones is covered by the 4-clones curve because they both reach their optimum likelihood using a relatively small ( $< 1000$ ) number of initializations.

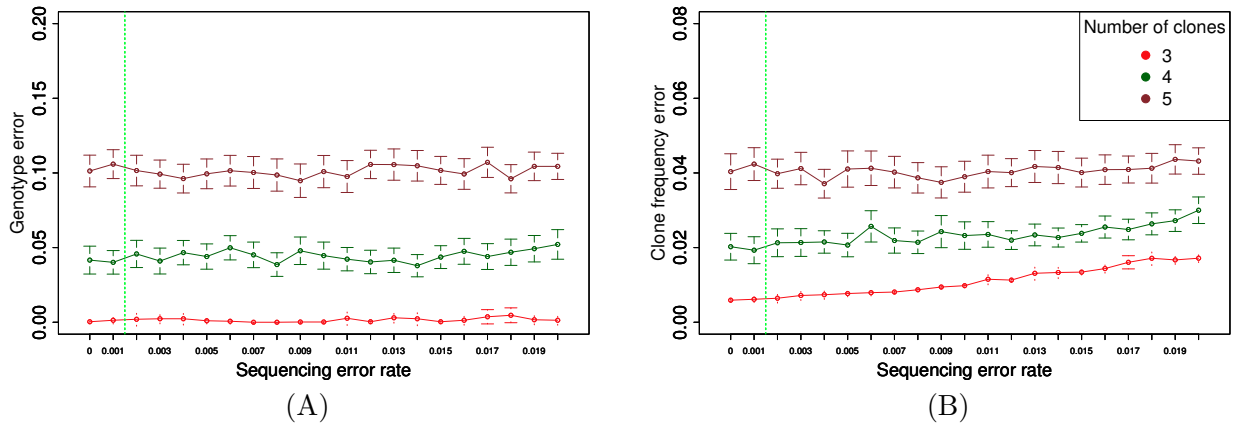

**Figure S 6: The effect of sequencing noise on the performance of Clomial.** The figure plots the mean (A) genotype error  $e_Z$  and (B) clone frequency error  $e_P$  as a function of sequencing error rate. The experiments were run as described in Figure 2 using 10 simulated subsections, and the sequencing error rate is the probability that a non-tumor allele is read as tumor allele or vice versa. (A) The genotype error is not affected by sequencing noise less than 0.02. (B) The change in frequency error is negligible when the noise is less than 0.01. The green vertical lines correspond to a sequencing error rate of 0.0015, which is the estimated empirical error rate from our deep sequencing experiment, estimated by averaging the frequency of the tumor alleles in the normal subsections (Figure 4).

|        | Primary tumor |      |      |      |      |      |      |      |      |      | Metastasis |      | Normal |
|--------|---------------|------|------|------|------|------|------|------|------|------|------------|------|--------|
|        | P1-1          | P1-2 | P1-3 | P1-4 | P2-1 | P2-2 | P2-3 | P2-4 | P3-1 | P3-2 | M1-1       | M1-2 | N1-1   |
| chr1   | 416           | 519  | 358  | 202  | 286  | 340  | 490  | 256  | 188  | 366  | 1          | 0    | 4      |
| chr3a  | 73            | 969  | 696  | 517  | 546  | 621  | 903  | 471  | 13   | 596  | 0          | 0    | 1      |
| chr3b  | 0             | 0    | 1    | 1    | 0    | 0    | 0    | 0    | 0    | 0    | 228        | 230  | 0      |
| chr3c  | 0             | 0    | 1    | 0    | 2    | 2    | 0    | 0    | 2    | 0    | 122        | 179  | 2      |
| chr4a  | 144           | 294  | 163  | 148  | 173  | 229  | 341  | 173  | 96   | 197  | 112        | 169  | 6      |
| chr4b  | 665           | 962  | 619  | 321  | 508  | 531  | 863  | 391  | 310  | 541  | 6          | 2    | 3      |
| chr5   | 251           | 328  | 209  | 118  | 175  | 194  | 329  | 181  | 100  | 203  | 1          | 0    | 2      |
| chr6   | 0             | 0    | 0    | 0    | 0    | 0    | 0    | 0    | 0    | 0    | 461        | 479  | 0      |
| chr9a  | 571           | 755  | 419  | 265  | 485  | 518  | 851  | 483  | 337  | 495  | 2          | 0    | 6      |
| chr9b  | 604           | 958  | 500  | 364  | 583  | 718  | 1101 | 566  | 338  | 691  | 541        | 1120 | 3      |
| chr12  | 1246          | 2024 | 1213 | 618  | 1196 | 1252 | 2297 | 1109 | 752  | 1438 | 2          | 3    | 27     |
| chr16  | 1341          | 1883 | 1007 | 596  | 820  | 1086 | 1591 | 1018 | 495  | 1046 | 6          | 1    | 11     |
| chr17a | 0             | 2    | 0    | 1    | 0    | 0    | 0    | 0    | 0    | 0    | 217        | 0    | 1      |
| chr17b | 713           | 900  | 592  | 358  | 440  | 612  | 841  | 421  | 314  | 621  | 2          | 0    | 7      |
| chr17c | 172           | 240  | 3    | 1    | 21   | 21   | 128  | 134  | 114  | 87   | 2          | 0    | 2      |
| chr20a | 0             | 0    | 0    | 0    | 0    | 0    | 2    | 0    | 0    | 0    | 322        | 401  | 3      |
| chr20b | 609           | 933  | 624  | 304  | 628  | 627  | 967  | 550  | 320  | 563  | 2          | 2    | 2      |
| chr1   | 2144          | 2898 | 2382 | 2627 | 2108 | 2281 | 2844 | 2193 | 2290 | 2165 | 3107       | 2447 | 2791   |
| chr3a  | 2981          | 4085 | 3217 | 3475 | 2747 | 2868 | 3479 | 2654 | 2901 | 2540 | 3981       | 2900 | 3080   |
| chr3b  | 1659          | 2005 | 1478 | 1883 | 1280 | 1520 | 1559 | 1279 | 1511 | 1199 | 1772       | 1384 | 1390   |
| chr3c  | 2813          | 3535 | 3016 | 3439 | 2865 | 3071 | 3534 | 2764 | 2865 | 2598 | 3645       | 2740 | 3255   |
| chr4a  | 646           | 1120 | 894  | 870  | 1073 | 1166 | 1293 | 1157 | 1040 | 911  | 930        | 1075 | 1304   |
| chr4b  | 3745          | 5438 | 4420 | 4591 | 4009 | 4021 | 4980 | 4042 | 4109 | 3688 | 5438       | 4592 | 4802   |
| chr5   | 1035          | 1396 | 1100 | 1157 | 844  | 965  | 1407 | 1105 | 944  | 965  | 1438       | 1301 | 1233   |
| chr6   | 2498          | 3056 | 2515 | 2713 | 2201 | 2494 | 3154 | 2557 | 2517 | 2445 | 3595       | 3302 | 2627   |
| chr9a  | 2197          | 2874 | 2131 | 2358 | 2643 | 2477 | 3194 | 3033 | 2686 | 2220 | 2670       | 2750 | 2826   |
| chr9b  | 2121          | 3591 | 2356 | 2445 | 2912 | 2828 | 3953 | 3293 | 2753 | 2697 | 3490       | 3791 | 3194   |
| chr12  | 3758          | 6235 | 4701 | 4520 | 5834 | 5332 | 7200 | 5409 | 5343 | 5201 | 5435       | 5413 | 6007   |
| chr16  | 3141          | 4245 | 3248 | 3188 | 2844 | 2979 | 3826 | 3044 | 2606 | 2978 | 3406       | 2729 | 3070   |
| chr17a | 3136          | 4169 | 3774 | 4474 | 3430 | 3408 | 4431 | 3726 | 3880 | 3113 | 5066       | 3941 | 5200   |
| chr17b | 1934          | 2560 | 2320 | 2794 | 2034 | 2150 | 2513 | 2134 | 2500 | 2077 | 2855       | 2387 | 2831   |
| chr17c | 1432          | 2271 | 2209 | 2061 | 2247 | 2204 | 2705 | 2013 | 2130 | 1975 | 2930       | 2617 | 2670   |
| chr20a | 2295          | 3479 | 2536 | 2680 | 2703 | 2628 | 3611 | 3035 | 2739 | 2623 | 4010       | 4039 | 3318   |
| chr20b | 2371          | 3828 | 2943 | 2684 | 3367 | 3175 | 4151 | 3374 | 3154 | 2856 | 4126       | 4413 | 3876   |

**Table S 1: Allele counts.** The table lists the number of observed tumor allele reads (top) and total number of reads (bottom) per locus, for all 17 loci. These two matrices constitute the entire input to the EM estimation procedure.

|                                                                                                 | Inferred |    |    | $M_1$   |    |    | $M_2$         |    |    | $M_3$  |    |    | $M_4$   |    |    | $M_5$  |    |    | $M_6$  |    |    |
|-------------------------------------------------------------------------------------------------|----------|----|----|---------|----|----|---------------|----|----|--------|----|----|---------|----|----|--------|----|----|--------|----|----|
|                                                                                                 | C1       | C2 | C3 | C1      | C2 | C3 | C1            | C2 | C3 | C1     | C2 | C3 | C1      | C2 | C3 | C1     | C2 | C3 | C1     | C2 | C3 |
|  <b>chr4a</b>  | 1        | 0  | 1  | 0*      | 0  | 1  | 1             | 1* | 1  | 1      | 0  | 0* | 1       | 0  | 1  | 1      | 0  | 1  | 1      | 0  | 1  |
| chr9b                                                                                           | 1        | 1  | 1  | 1       | 1  | 1  | 1             | 1  | 1  | 1      | 1  | 1  | 1       | 1  | 1  | 1      | 1  | 1  | 1      | 1  | 1  |
|  chr1          | 1        | 0  | 0  | 1       | 0  | 0  | 1             | 0  | 0  | 1      | 0  | 0  | 1       | 0  | 0  | 1      | 0  | 0  | 1      | 0  | 0  |
| chr4b                                                                                           | 1        | 0  | 0  | 1       | 0  | 0  | 1             | 0  | 0  | 1      | 0  | 0  | 1       | 0  | 0  | 1      | 0  | 0  | 1      | 0  | 0  |
|  <b>chr12</b>  | 1        | 1  | 0  | 1       | 1  | 0  | 1             | 1  | 0  | 1      | 1  | 0  | 0*      | 1  | 0  | 1      | 0* | 0  | 1      | 1  | 1* |
|  <b>chr16</b>  | 1        | 1  | 0  | 1       | 1  | 0  | 1             | 1  | 0  | 1      | 1  | 0  | 0*      | 1  | 0  | 1      | 0* | 0  | 1      | 1  | 1* |
|  <b>chr17b</b> | 1        | 1  | 0  | 1       | 1  | 0  | 1             | 1  | 0  | 1      | 1  | 0  | 0*      | 1  | 0  | 1      | 0* | 0  | 1      | 1  | 1* |
|  chr5          | 1        | 0  | 0  | 1       | 0  | 0  | 1             | 0  | 0  | 1      | 0  | 0  | 1       | 0  | 0  | 1      | 0  | 0  | 1      | 0  | 0  |
| chr9a                                                                                           | 1        | 0  | 0  | 1       | 0  | 0  | 1             | 0  | 0  | 1      | 0  | 0  | 1       | 0  | 0  | 1      | 0  | 0  | 1      | 0  | 0  |
| chr20b                                                                                          | 1        | 0  | 0  | 1       | 0  | 0  | 1             | 0  | 0  | 1      | 0  | 0  | 1       | 0  | 0  | 1      | 0  | 0  | 1      | 0  | 0  |
|  chr3a       | 1        | 0  | 0  | 1       | 0  | 0  | 1             | 0  | 0  | 1      | 0  | 0  | 1       | 0  | 0  | 1      | 0  | 0  | 1      | 0  | 0  |
|  chr17c      | 0        | 1  | 0  | 0       | 1  | 0  | 0             | 1  | 0  | 0      | 1  | 0  | 0       | 1  | 0  | 0      | 1  | 0  | 0      | 1  | 0  |
|  chr3c       | 0        | 0  | 1  | 0       | 0  | 1  | 0             | 0  | 1  | 0      | 0  | 1  | 0       | 0  | 1  | 0      | 0  | 1  | 0      | 0  | 1  |
| chr17a                                                                                          | 0        | 0  | 1  | 0       | 0  | 1  | 0             | 0  | 1  | 0      | 0  | 1  | 0       | 0  | 1  | 0      | 0  | 1  | 0      | 0  | 1  |
| chr20a                                                                                          | 0        | 0  | 1  | 0       | 0  | 1  | 0             | 0  | 1  | 0      | 0  | 1  | 0       | 0  | 1  | 0      | 0  | 1  | 0      | 0  | 1  |
|  chr3b       | 0        | 0  | 1  | 0       | 0  | 1  | 0             | 0  | 1  | 0      | 0  | 1  | 0       | 0  | 1  | 0      | 0  | 1  | 0      | 0  | 1  |
| chr6                                                                                            | 0        | 0  | 1  | 0       | 0  | 1  | 0             | 0  | 1  | 0      | 0  | 1  | 0       | 0  | 1  | 0      | 0  | 1  | 0      | 0  | 1  |
| log-likelihood                                                                                  | -4,244   |    |    | -21,282 |    |    | <b>-4,333</b> |    |    | -5,659 |    |    | -28,482 |    |    | -7,500 |    |    | -6,692 |    |    |

**Table S 2: Modified genotypes and the corresponding likelihoods.** Genotype for C=4 after any of the above modifications is done. The inferred genotype, and all of the six possible modifications are shown, where each asterisk indicates a flipped bit. The associated log-likelihoods are reported. The phylogeny tree presented in Figure 6C was made based on modification  $M_2$  which had the highest likelihood.

|         | Clomial |     |    |    | Manual |    |    |    | PhyloSub |    |    |    |
|---------|---------|-----|----|----|--------|----|----|----|----------|----|----|----|
|         | C1      | C2* | C3 | C4 | C1     | C2 | C3 | C4 | C1       | C2 | C3 | C4 |
| BCL2L13 | 1       | 0*  | 1  | 1  | 1      | 1  | 1  | 1  | 1        | 1  | 1  | 1  |
| COL24A1 | 0       | 1   | 0  | 0  | 0      | 1  | 0  | 0  | 0        | 1  | 0  | 0  |
| DAZAP1  | 0       | 0   | 1  | 1  | 0      | 0  | 1  | 1  | 0        | 0  | 1  | 1  |
| EXOC6B  | 0       | 0   | 1  | 1  | 0      | 0  | 1  | 1  | 0        | 0  | 1  | 1  |
| GHDC    | 0       | 0   | 1  | 1  | 0      | 0  | 1  | 1  | 0        | 0  | 1  | 1  |
| GPR158  | 1       | 0*  | 1  | 1  | 1      | 1  | 1  | 1  | 1        | 1  | 1  | 1  |
| HMCN1   | 0       | 1   | 0  | 0  | 0      | 1  | 0  | 0  | 0        | 1  | 0  | 0  |
| KLHDC2  | 0       | 1   | 0  | 0  | 0      | 1  | 0  | 0  | 0        | 1  | 0  | 0  |
| LRRC16A | 0       | 0   | 0  | 1  | 0      | 0  | 0  | 1  | 0        | 0  | 0  | 1  |
| MAP2K1  | 0       | 1   | 0  | 0  | 0      | 1  | 0  | 0  | 0        | 1  | 0  | 0  |
| NAMPTL  | 1       | 0*  | 1  | 1  | 1      | 1  | 1  | 1  | 1        | 1  | 1  | 1  |
| NOD1    | 0       | 1   | 0  | 0  | 0      | 1  | 0  | 0  | 0        | 1  | 0  | 0  |
| OCA2    | 0       | 0   | 1  | 1  | 0      | 0  | 1  | 1  | 0        | 0  | 1  | 1  |
| PLA2G16 | 0       | 0   | 1  | 1  | 0      | 0  | 1  | 1  | 0        | 0  | 1  | 1  |
| SAMHD1  | 1       | 1   | 1  | 1  | 1      | 1  | 1  | 1  | 1        | 1  | 1  | 1  |
| SLC12A1 | 1       | 0*  | 1  | 1  | 1      | 1  | 1  | 1  | 1        | 1  | 1  | 1  |

|          |     | a    | b    | c    | d    | e           |
|----------|-----|------|------|------|------|-------------|
| Clomial  | C0  | 0.00 | 0.00 | 0.00 | 0.00 | <b>0.00</b> |
|          | C1  | 0.27 | 0.18 | 0.16 | 0.23 | <b>0.43</b> |
|          | C2* | 0.01 | 0.03 | 0.04 | 0.12 | 0.34        |
|          | C3  | 0.39 | 0.27 | 0.30 | 0.26 | 0.13        |
|          | C4  | 0.33 | 0.52 | 0.50 | 0.39 | 0.10        |
| Manual   | C0  | 0.08 | 0.03 | 0.00 | 0.04 | 0.38        |
|          | C1  | 0.20 | 0.15 | 0.16 | 0.17 | 0.08        |
|          | C2  | 0.00 | 0.03 | 0.04 | 0.14 | 0.31        |
|          | C3  | 0.39 | 0.27 | 0.30 | 0.26 | 0.13        |
|          | C4  | 0.33 | 0.52 | 0.50 | 0.39 | 0.10        |
| PhyloSub | C0  | 0.09 | 0.03 | 0.01 | 0.04 | 0.40        |
|          | C1  | 0.15 | 0.17 | 0.17 | 0.17 | 0.04        |
|          | C2  | 0.00 | 0.03 | 0.03 | 0.13 | 0.32        |
|          | C3  | 0.39 | 0.19 | 0.33 | 0.28 | 0.16        |
|          | C4  | 0.37 | 0.58 | 0.46 | 0.38 | 0.08        |

**Table S 3: Comparing different methods on the CLL077 data set.** The top table lists, for each of the 16 loci of CLL077, the clonal genotypes inferred by Clomial, manual analysis carried out by Shuh et al. [1], and PhyloSub. In each case, the normal clone (C0) is omitted because its genotype consists entirely of zeroes. Any bit predicted not the same as the manual analysis is marked by an asterisk in the genotypes matrices. The corresponding inferred clonal frequencies are listed in the bottom table, where each block shows a matrix  $P$  derived by one of the three methods and C0 denotes the normal clone. Frequencies that differ by more than 0.1 from the manual estimates are in bold. All three methods predict the same genotypes for clones C1, C3, and C4. Unlike manual analysis and PhyloSub, Clomial does not consider C2\* to be a subclone of C1. Instead, it identifies C2\* by a set of mutations which are present mostly in sample e, the most recent one (data not shown). The frequencies from all the three methods are generally close.

|         | Clomial |    |     |     | Manual |    |    |    | PhyloSub |    |    |    |
|---------|---------|----|-----|-----|--------|----|----|----|----------|----|----|----|
|         | C1      | C2 | C3* | C4* | C1     | C2 | C3 | C4 | C1       | C2 | C3 | C4 |
| ADAD1   | 1       | 1  | 1   | 1   | 1      | 1  | 1  | 1  | 1        | 1  | 1  | 1  |
| AMTN    | 0       | 1  | 0   | 1*  | 0      | 1  | 0  | 0  | 0        | 1  | 0  | 0  |
| APBB2   | 0       | 1  | 0   | 1*  | 0      | 1  | 0  | 0  | 0        | 1  | 0  | 0  |
| ASXL1   | 1       | 0  | 0   | 1*  | 1      | 0  | 0  | 1  | 1        | 0  | 0  | 1  |
| ATM     | 0       | 1  | 1*  | 1*  | 0      | 1  | 0  | 0  | 0        | 1  | 0  | 0  |
| BPIL2   | 0       | 1  | 0   | 1*  | 0      | 1  | 0  | 0  | 0        | 1  | 0  | 0  |
| CHRNA2  | 1       | 0  | 0   | 0   | 1      | 0  | 0  | 0  | 1        | 0  | 0  | 0  |
| CHTF8   | 1       | 1  | 1   | 1   | 1      | 1  | 1  | 1  | 1        | 1  | 1  | 1  |
| FAT3    | 1       | 0  | 0   | 0   | 1      | 0  | 0  | 0  | 1        | 0  | 0  | 0  |
| HERC2   | 1       | 1  | 1   | 1   | 1      | 1  | 1  | 1  | 1        | 1  | 1  | 1  |
| IL11RA  | 1       | 1  | 0*  | 1   | 1      | 1  | 1  | 1  | 1        | 1  | 1  | 1  |
| MTUS1   | 0       | 1  | 0   | 1*  | 0      | 1  | 0  | 0  | 0        | 1  | 0  | 0  |
| MUSK    | 1       | 0  | 0   | 1   | 1      | 0  | 0  | 1  | 1        | 0  | 0  | 1  |
| NPY     | 1       | 0  | 0   | 0   | 1      | 0  | 0  | 0  | 1        | 0  | 0  | 0  |
| NRG3    | 1       | 0  | 0   | 0   | 1      | 0  | 0  | 0  | 1        | 0  | 0  | 0  |
| PLEKHG5 | 0       | 1  | 0   | 1*  | 0      | 1  | 0  | 0  | 0        | 1  | 0  | 0  |
| SEMA3E  | 1       | 0  | 0   | 1*  | 1      | 0  | 0  | 1  | 1        | 0  | 0  | 1  |
| SF3B1   | 1       | 1  | 1   | 1   | 1      | 1  | 1  | 1  | 1        | 1  | 1  | 1  |
| SHROOM1 | 1       | 1  | 1   | 1   | 1      | 1  | 1  | 1  | 1        | 1  | 1  | 1  |
| SPTAN1  | 0       | 1  | 0   | 1*  | 0      | 1  | 0  | 0  | 0        | 1  | 0  | 0  |

|          |     | a           | b    | c           | d    | e            |
|----------|-----|-------------|------|-------------|------|--------------|
| Clomial  | C0  | 0.00        | 0.00 | 0.35        | 0.09 | 0.03         |
|          | C1  | 0.00        | 0.01 | 0.46        | 0.91 | 0.96         |
|          | C2  | 0.72        | 0.84 | <b>0.01</b> | 0.00 | 0.00         |
|          | C3* | <b>0.18</b> | 0.08 | 0.06        | 0.00 | 0.00         |
|          | C4* | 0.10        | 0.07 | 0.12        | 0.01 | 0.01         |
| Manual   | C0  | 0.06        | 0.02 | 0.30        | 0.06 | 0.02         |
|          | C1  | 0.00        | 0.01 | 0.44        | 0.89 | 0.96         |
|          | C2  | 0.82        | 0.91 | 0.13        | 0.00 | 0.00         |
|          | C3  | 0.03        | 0.00 | 0.00        | 0.00 | 0.00         |
|          | C4  | 0.09        | 0.06 | 0.13        | 0.05 | 0.03         |
| PhyloSub | C0  | 0.08        | 0.00 | 0.36        | 0.08 | 0.01         |
|          | C1  | 0.00        | 0.00 | 0.43        | 0.92 | 0.99         |
|          | C2  | 0.79        | 0.86 | 0.11        | 0.00 | 0.00         |
|          | C3  | 0.00        | 0.07 | 0.00        | 0.00 | 0.01         |
|          | C4  | 0.13        | 0.07 | 0.10        | 0.00 | <b>-0.01</b> |

**Table S 4: Comparing different methods on the CLL003 data set.** The tables lists, for each of the 20 loci of CLL003, the clonal genotypes inferred by Clomial, manual analysis, and PhyloSub, using notation similar to Table S3. All three methods agree on the genotypes of the dominant clones C1 and C2, which have relatively high frequencies. Also, the corresponding frequencies for these clones, and also the normal clone, are similar between the three inference methods. However, Clomial does not agree with the manual analysis on the genotypes of C3\* and C4\*. PhyloSub incorrectly predicts a negative frequency for clone C4 in sample e.

|           | Clomial |    |    |     | Manual |    |    |    |    | PhyloSub |    |     |    |    |     |
|-----------|---------|----|----|-----|--------|----|----|----|----|----------|----|-----|----|----|-----|
|           | C1      | C2 | C3 | C4* | C1     | C2 | C3 | C4 | C5 | C1       | C2 | C3* | C4 | C5 | C6* |
| ARHGAP29  | 1       | 1  | 1  | 1   | 1      | 1  | 1  | 1  | 1  | 1        | 1  | 1   | 1  | 1  | 1   |
| EGFR      | 1       | 1  | 1  | 1   | 1      | 1  | 1  | 1  | 1  | 1        | 1  | 1   | 1  | 1  | 0   |
| IRF4      | 0*      | 0  | 0  | 1   | 1      | 0  | 0  | 0  | 1  | 1        | 0  | 0   | 0  | 1  | 0   |
| KIAA0182  | 1       | 1  | 1  | 1   | 1      | 1  | 1  | 1  | 1  | 1        | 1  | 1   | 1  | 1  | 1   |
| KIAA0319L | 1       | 0  | 0  | 1   | 1      | 0  | 0  | 1  | 1  | 1        | 0  | 0   | 1  | 1  | 0   |
| KLHL4     | 1       | 1  | 1  | 1   | 1      | 1  | 1  | 1  | 1  | 1        | 1  | 1   | 1  | 1  | 1   |
| MED12     | 1       | 1  | 1  | 1   | 1      | 1  | 1  | 1  | 1  | 1        | 1  | 1   | 1  | 1  | 1   |
| PILRB     | 1       | 1  | 1  | 1   | 1      | 1  | 1  | 1  | 1  | 1        | 1  | 1   | 1  | 1  | 1   |
| RBPJ      | 1       | 0  | 0  | 0   | 1      | 0  | 0  | 0  | 0  | 1        | 0  | 0   | 0  | 0  | 0   |
| SIK1      | 1       | 1  | 1  | 1   | 1      | 1  | 1  | 1  | 1  | 1        | 1  | 1   | 1  | 1  | 1   |
| U2AF1     | 1       | 1  | 0  | 1   | 1      | 1  | 0  | 1  | 1  | 1        | 1  | 0   | 1  | 1  | 0   |

|          |     | a    | b    | c    | d    | e    |
|----------|-----|------|------|------|------|------|
| Clomial  | C0  | 0.00 | 0.00 | 0.00 | 0.00 | 0.00 |
|          | C1  | 0.03 | 0.09 | 0.03 | 0.13 | 0.12 |
|          | C2  | 0.36 | 0.31 | 0.36 | 0.22 | 0.13 |
|          | C3  | 0.32 | 0.09 | 0.30 | 0.06 | 0.09 |
|          | C4* | 0.30 | 0.52 | 0.31 | 0.58 | 0.66 |
| Manual   | C0  | 0.00 | 0.00 | 0.00 | 0.00 | 0.00 |
|          | C1  | 0.02 | 0.09 | 0.03 | 0.13 | 0.13 |
|          | C2  | 0.31 | 0.31 | 0.32 | 0.22 | 0.17 |
|          | C3  | 0.32 | 0.09 | 0.30 | 0.06 | 0.09 |
|          | C4  | 0.11 | 0.08 | 0.11 | 0.15 | 0.04 |
|          | C5  | 0.24 | 0.43 | 0.24 | 0.44 | 0.57 |
| PhyloSub | C0  | 0.00 | 0.00 | 0.00 | 0.00 | 0.00 |
|          | C1  | 0.02 | 0.08 | 0.03 | 0.14 | 0.13 |
|          | C2  | 0.33 | 0.37 | 0.36 | 0.22 | 0.16 |
|          | C3* | 0.23 | 0.05 | 0.20 | 0.04 | 0.05 |
|          | C4  | 0.13 | 0.03 | 0.08 | 0.17 | 0.05 |
|          | C5  | 0.23 | 0.45 | 0.26 | 0.41 | 0.56 |
|          | C6* | 0.06 | 0.02 | 0.07 | 0.02 | 0.05 |

**Table S 5: Comparing different methods on the CLL006 data set.** The tables lists, for each of the 11 loci of CLL006, the clonal genotypes inferred by Clomial, manual analysis, and PhyloSub, using notation similar to Table S3. All three methods predict the same genotypes for clones C1, C2, and C3, except mutation of IRF4 which is absent in C1 according to Clomial. The corresponding frequencies are also very close, if we assume that PhyloSub splits C3 from the manual analysis to C3\* and C6\*. Given only five samples, Clomial can infer a maximum of five clones, including the normal clone. Therefore, Clomial merges C4 and C5 from the manual analysis to C4\*, as is evident from comparison of the corresponding genotypes and frequencies. All three methods agree that the normal contamination in all samples is less than 1%.



## References

- [1] A. Schuh, J. Becq, S. Humphray, A. Alexa, A. Burns, R. Clifford, S. M. Feller, R. Grocock, S. Henderson, I. Khrebtukova, et al. Monitoring chronic lymphocytic leukemia progression by whole genome sequencing reveals heterogeneous clonal evolution patterns. *Blood*, 120(20):4191–4196, 2012.
